# Supplementary material for: Apoptotic and Necroptotic Mediators are Differentially Expressed in Mucinous and Non-Mucinous Colorectal Cancer
Source: PubMed Central journal article supplement (PMC9334008; doi:10.3389/fonc.2022.815001), 2022-07-14
Supplement: DataSheet_1.pdf [file DataSheet_1.pdf]

## Supplemental data

| <b>Protein target</b> | <b>Size (kDA)</b> | <b>Secondary</b> | <b>Dilution</b> | <b>Company</b>            | <b>Purchase Code</b> |
|-----------------------|-------------------|------------------|-----------------|---------------------------|----------------------|
| Caspase 3             | 35                | Rabbit           | 1:1000          | Cell Signaling Technology | #9662                |
| Caspase 8             | 57                | Mouse            | 1:000           | Cell Signaling Technology | #9746                |
| Caspase 9             | 47                | Rabbit           | 1:1000          | Cell Signaling Technology | #9502                |
| Cleaved Caspase 3     | 17,19             | Rabbit           | 1:250           | Cell Signaling Technology | #9664                |
| Cleaved Caspase 8     | 43,44             | Rabbit           | 1:500           | Cell Signaling Technology | #9496                |
| BCL-2                 | 26                | Mouse            | 1:500           | Santa Cruz                | #sc-509              |
| BCL-xl                | 20                | Rabbit           | 1:1000          | Cell Signaling Technology | #2764                |
| Bax                   | 25                | Rabbit           | 1:1000          | Cell Signaling Technology | #2772                |
| Bak                   | 25                | Rabbit           | 1:1000          | Cell Signaling Technology | #12105               |
| BID                   | 22                | Mouse            | 1:1000          | Cell Signaling Technology | #2002                |
| MCL1                  | 40                | Rabbit           | 1:1000          | Cell Signaling Technology | #5453                |
| RIP1                  | 78                | Rabbit           | 1:500           | Cell Signaling Technology | #44590               |
| RIP3                  | 46-62             | Rabbit           | 1:250           | Cell Signaling Technology | #95702               |
| MLKL                  | 54                | Rabbit           | 1:500           | Cell Signaling Technology | #91689               |
| p-RIP1                | 78-82             | Rabbit           | 1:1000          | Cell Signaling Technology | #65746               |
| p-RIP3                | 46-62             | Rabbit           | 1:500           | Cell Signaling Technology | #93654               |
| p-MLKL                | 54                | Rabbit           | 1:1000          | Cell Signaling Technology | #91689               |

**Table S2. Characteristics of mucinous and non-mucinous rectal cancer cases in tumor micro-array**

|                                    | <b>Full Cohort</b> | <b>Mucinous</b> | <b>Non-mucinous</b> | <b>p</b> |
|------------------------------------|--------------------|-----------------|---------------------|----------|
|                                    | N=53               | N=14            | N=39                |          |
| Age (years)                        | 68.25 (11.5)       | 63.5 (16.3)     | 69.95 (8.87)        | 0.070    |
| Sex (male)                         | 30 (56.6%)         | 7 (50.0%)       | 23 (59.0%)          | 0.756    |
| AJCC Stage                         |                    |                 |                     | 0.503    |
| I                                  | 7 (13.2%)          | 2 (14.3%)       | 5 (12.8%)           |          |
| II                                 | 24 (45.3%)         | 8 (57.1%)       | 16 (41.0%)          |          |
| III                                | 22 (41.5%)         | 4 (28.6%)       | 18 (46.2%)          |          |
| T Stage                            |                    |                 |                     | 0.620    |
| T1                                 | 2 (3.8%)           | 0 (0.0%)        | 2 (5.1%)            |          |
| T2                                 | 11 (20.8%)         | 3 (21.4%)       | 8 (20.5%)           |          |
| T3                                 | 35 (62.3%)         | 8 (57.1%)       | 27 (64.1%)          |          |
| T4                                 | 7 (13.2%)          | 3 (21.4%)       | 4 (10.3%)           |          |
| Node status                        |                    |                 |                     | 0.061    |
| N0                                 | 31 (58.5%)         | 10 (71.4%)      | 21 (53.8%)          |          |
| N1                                 | 16 (30.2%)         | 1 (7.1%)        | 15 (38.5%)          |          |
| N2                                 | 6 (11.3%)          | 3 (21.4%)       | 3 (7.7%)            |          |
| Grade (54)                         |                    |                 |                     | 0.556    |
| Well                               | 1 (1.9%)           | 0 (0.0%)        | 1 (2.6%)            |          |
| Moderate                           | 49 (94.2%)         | 14 (100%)       | 35 (92.1%)          |          |
| Poor                               | 2 (3.8%)           | 0 (0.0%)        | 2 (5.3%)            |          |
| R0 margins                         | 51 (96.2%)         | 12 (85.7%)      | 39 (100%)           | 0.066    |
| LVI                                | 9 (17.0%)          | 1 (7.1%)        | 8 (20.5%)           | 0.416    |
| PNI                                | 7 (13.2%)          | 2 (14.3%)       | 5 (12.8%)           | 1.000    |
| EMVI                               | 9 (17.0%)          | 1 (7.1%)        | 8 (20.5%)           | 0.416    |
| MSI                                | 3 (5.8%)           | 2 (14.3%)       | 1 (2.6%)            | 0.173    |
| KRAS mutant                        | 12 (22.6%)         | 5 (35.7%)       | 7 (17.9%)           | 0.263    |
| BRAF mutant                        | 2 (3.8%)           | 1 (7.7%)        | 1 (2.6%)            | 0.441    |
| Neoadjuvant chemoradiotherapy (52) | 36 (69.2%)         | 8 (57.1%)       | 28 (73.7%)          | 0.316    |
| Adjuvant chemotherapy (47)         | 24 (51.1%)         | 8 (66.7%)       | 15 (42.9%)          | 0.193    |
| Recurrence                         | 7 (13.2%)          | 2 (14.3%)       | 5 (12.8%)           | 1.000    |
| Cancer-related mortality           | 1 (1.9%)           | 1 (7.1%)        | 0 (0.0%)            | 0.264    |
| Overall mortality                  | 17 (32.1%)         | 3 (21.4%)       | 15 (35.9%)          | 0.506    |

N (%) or mean (SD), unpaired t test to compare continuous variables. Chi square to compare categorical variables.

**Table S3(a) Mean protein expression in mucinous and non-mucinous rectal cancer cell lines treated with 25uM 5FU**

|            | Mucinous (SW1463) |             |                  | Non-mucinous (SW837) |               |       |
|------------|-------------------|-------------|------------------|----------------------|---------------|-------|
|            | Control           | 25uM 5FU    | P                | Control              | 25uM 5FU      | p     |
| CC3        | 0.17 (0.07)       | 1.66 (0.44) | <b>0.004</b>     | 0.005 (0.008)        | 0.006 (0.01)  | 0.972 |
| CC3/C3     | 0.19 (0.008)      | 1.55 (0.10) | <b>&lt;0.001</b> | 0.006 (0.009)        | 0.005 (0.009) | 0.985 |
| CC8        | 0.36 (0.34)       | 0.84 (0.31) | 0.146            | 0.12 (0.12)          | 0.12 (0.15)   | 0.998 |
| CC8/Casp8  | 0.51 (0.43)       | 1.53 (1.48) | 0.448            | 0.14 (0.07)          | 0.18 (0.05)   | 0.633 |
| pRIP1      | 0.05 (0.04)       | 0.18 (0.21) | 0.378            | 0.45 (0.69)          | 0.15 (0.07)   | 0.487 |
| pRIP1/RIP1 | 0.53 (0.33)       | 0.54 (0.36) | 0.995            | 1.73 (2.63)          | 0.34 (0.15)   | 0.413 |
| pRIP3      | 0.16 (0.09)       | 0.33 (0.09) | 0.097            | 0.04 (0.06)          | 0.03 (0.01)   | 0.807 |
| pRIP3/RIP3 | 1.44 (0.57)       | 9.47 (8.03) | 0.272            | 0.05 (0.08)          | 0.20 (0.08)   | 0.112 |
| pMLKL      | 0.08 (0.05)       | 0.36 (0.23) | 0.104            | 0.02 (0.01)          | 0.05 (0.04)   | 0.238 |
| pMLKL/MLKL | 0.08 (0.04)       | 0.62 (0.09) | <b>0.001</b>     | 0.07 (0.05)          | 0.17 (0.05)   | 0.083 |

**Table S3(b) Mean protein expression in mucinous and non-mucinous colon cancer cell lines treated with 25uM 5FU**

|            | Mucinous (LS174T) |             |                  | Non-mucinous (HCT116) |              |               |
|------------|-------------------|-------------|------------------|-----------------------|--------------|---------------|
|            | Control           | 25uM 5FU    | P                | Control               | 25uM 5FU     | p             |
| CC3        | 0.006 (0.01)      | 0.27 (0.24) | 0.122            | 0.01 (0.01)           | 0.27 (0.30)  | 0.218         |
| CC3/C3     | 0.01 (0.01)       | 0.32 (0.01) | <b>&lt;0.001</b> | 0.02 (0.03)           | 0.40 (0.02)  | <b>0.0001</b> |
| CC8        | 0.38 (0.29)       | 0.21 (0.31) | 0.552            | 0.20 (0.28)           | 2.16 (1.29)  | 0.062         |
| CC8/Casp8  | 2.64 (1.58)       | 1.50 (1.62) | 0.549            | 0.48 (0.54)           | 6.17 (1.46)  | <b>0.035</b>  |
| pRIP1      | 0.13 (0.11)       | 0.14 (0.04) | 0.904            | 0.04 (0.01)           | 0.29 (0.04)  | <b>0.0007</b> |
| pRIP1/RIP1 | 0.23 (0.18)       | 0.33 (0.09) | 0.435            | 0.04 (0.01)           | 0.63 (0.24)  | <b>0.013</b>  |
| pRIP3      | 0.41 (0.15)       | 1.17 (0.44) | <b>0.048</b>     | 0.02 (0.03)           | 0.01 (0.002) | 0.441         |
| pRIP3/RIP3 | 1.63 (0.84)       | 3.81 (2.03) | 0.160            | 0.02 (0.04)           | 0.03 (0.02)  | 0.737         |
| pMLKL      | 0.33 (0.08)       | 0.84 (0.12) | <b>0.004</b>     | 0.02 (0.02)           | 0.01 (0.009) | 0.446         |
| pMLKL/MLKL | 0.45 (0.25)       | 3.72 (2.45) | 0.083            | 0.12 (0.18)           | 0.03 (0.06)  | 0.496         |

**Table S4. Characteristics of 598 mucinous and non-mucinous colorectal cases in TCGA dataset**

|                                | Full Cohort | Mucinous    | Non-mucinous | p      |
|--------------------------------|-------------|-------------|--------------|--------|
|                                | N=598       | N=74        | N=524        |        |
| Age (years)                    | 67.5 (18)   | 66.5 (25.5) | 68 (18)      | 0.409  |
| Sex (male)                     | 318 (53.2%) | 37 (50.0%)  | 281 (53.6%)  | 0.619  |
| Cancer type                    |             |             |              | 0.116  |
| Colon                          | 434 (74.4%) | 60 (82.2%)  | 374 (73.3%)  |        |
| Rectal                         | 149 (25.6%) | 13 (17.8%)  | 136 (26.7%)  |        |
| Site (583)                     |             |             |              | <0.001 |
| Proximal                       | 265 (45.5%) | 50 (68.5%)  | 215 (42.2%)  |        |
| Distal                         | 169 (29.0%) | 10 (13.7%)  | 159 (31.2%)  |        |
| Rectal                         | 149 (25.6%) | 13 (17.8%)  | 136 (26.7%)  |        |
| AJCC Stage (579)               |             |             |              | 0.542  |
| I                              | 100 (17.3%) | 10 (13.7%)  | 90 (17.8%)   |        |
| II                             | 222 (38.3%) | 30 (41.1%)  | 192 (37.9%)  |        |
| III                            | 172 (29.7%) | 25 (34.2%)  | 147 (29.1%)  |        |
| IV                             | 85 (14.7%)  | 8 (11.0%)   | 77 (15.2%)   |        |
| T Stage (577)                  |             |             |              | 0.139  |
| T1-T2                          | 101 (17.5%) | 9 (12.5%)   | 92 (18.2%)   |        |
| T3                             | 408 (70.7%) | 50 (69.4%)  | 358 (70.9%)  |        |
| T4                             | 68 (11.8%)  | 13 (18.1%)  | 55 (10.9%)   |        |
| Node status                    |             |             |              | 0.758  |
| N0                             | 341 (57.3%) | 41 (55.4%)  | 300 (57.6%)  |        |
| N1                             | 144 (24.2%) | 17 (23.0%)  | 127 (24.4%)  |        |
| N2                             | 110 (18.5%) | 16 (21.6%)  | 94 (18.0%)   |        |
| LVI (536)                      | 221 (41.2%) | 24 (35.8%)  | 197 (42.0%)  | 0.356  |
| EMVI (515)                     | 128 (24.9%) | 13 (21.3%)  | 115 (25.3%)  | 0.636  |
| MSI (561)                      | 90 (16.0%)  | 22 (31.9%)  | 68 (13.8%)   | <0.001 |
| Progression (598)              | 152 (25.4%) | 18 (24.3%)  | 134 (25.6%)  | 0.887  |
| Cancer-related mortality (578) | 75 (13%)    | 10 (14.3%)  | 65 (12.8%)   | 0.706  |
| Overall mortality (598)        | 121 (20.2%) | 18 (24.3%)  | 103 (19.7%)  | 0.355  |

N (%). P value for X2 test. Numbers in brackets indicate variables with incomplete dataset.
